# Supplementary material for: Manifestation of the interplay between spin–orbit and Jahn–Teller effects in Au25 superatom UV-Vis fingerprint spectra
Source: Royal Society of Chemistry journal article supplement (doi:10.1039/d3sc00944k), 2023-01-01
Supplement: d3sc00944k1.pdf [file d3sc00944k1.pdf]

# Supporting Information for “Manifestation of the Interplay between Spin-Orbit and Jahn-Teller Effects in Au<sub>25</sub> Superatom UV-Vis Fingerprint Spectra”

Can Liao,<sup>†</sup> Manzhou Zhu,<sup>\*,‡</sup> De-en Jiang,<sup>\*,¶</sup> and Xiaosong Li<sup>\*,†</sup>

<sup>†</sup>*Department of Chemistry, University of Washington, Seattle, WA, 98195*

<sup>‡</sup>*Department of Chemistry and Center for Atomic Engineering of Advanced Materials, Anhui University, China*

<sup>¶</sup>*Department of Chemical and Biomolecular Engineering, Vanderbilt University, Nashville, TN, 37235*

E-mail: zms@ahu.edu.cn; de-en.jiang@vanderbilt.edu; xsli@uw.edu

## S1 Experimental Details

The Au<sub>25</sub>SPET<sub>18</sub> nanoclusters at the -1, 0, and +1 oxidation states were obtained using methods found in the literature.<sup>1-3</sup>

### S1.1 Preparation of the Au<sub>25</sub>SPET<sub>18</sub><sup>-</sup> nanocluster

0.4 mmol of HAuCl<sub>4</sub> · 3H<sub>2</sub>O (0.1576 g) dissolved in 5 mL water and 0.47 mmol of TOAB (0.2558 g) dissolved in 10 mL toluene were combined in a 25 mL tri-neck round bottom flask. The solution was vigorously stirred (1100 rpm) with a magnetic stir bar to facilitate

the phase transfer of the Au(III) ions into the toluene phase. After 15 minutes, phase transfer was completed, leaving a clear aqueous phase at the bottom of the flask. The aqueous solution was removed with a 10 mL syringe. The toluene solution of Au(III) was purged with N<sub>2</sub> and cooled to 0 °C in an ice bath for 30 minutes under magnetic stirring. 1.2 mmol of PhCH<sub>2</sub>CH<sub>2</sub>SH (0.17 mL) was added to the reaction, and stirring was reduced to 30 rpm. The deep red solution turned faint yellow after 5 minutes and finally to clear over 1 hour. After the solution turned to clear, the stirring speed was changed to 1100 rpm, and immediately, an aqueous solution of NaBH<sub>4</sub> (0.1550 g, 4 mmol, freshly made in 7 mL ice-cold water) was quickly added all at once. The reaction was allowed to proceed under N<sub>2</sub> atmosphere. After 12 hours, the aqueous layer at the bottom of the flask was removed using a syringe. The toluene solution was dried. The toluene solution was washed with 20 mL of CH<sub>3</sub>OH three times. After the wash, 20 mL of CH<sub>3</sub>CN was added to separate the obtained Au<sub>25</sub>SPET<sub>18</sub><sup>-1</sup>.

## **S1.2 Preparation of the Au<sub>25</sub>SR<sub>18</sub> nanocluster**

5 mg of the as-prepared Au<sub>25</sub>SPET<sub>18</sub><sup>-</sup> nanocluster was first dissolved in 20 mL of toluene and further reacted with 2 mL of H<sub>2</sub>O<sub>2</sub> solution (33%, aqueous). After 20 minutes, the product was separated by precipitation with ethanol and recrystallized in a mixture of toluene and ethanol.

## **S1.3 Preparation of the Au<sub>25</sub>SR<sub>18</sub><sup>+</sup> nanocluster**

3 mg of the as-prepared Au<sub>25</sub>SR<sub>18</sub><sup>-</sup> was first dissolved in 20 mL of toluene. 2 molar ratios of TEMPO<sup>+</sup> (TEMPO<sup>+</sup>BF<sub>4</sub><sup>-</sup> dissolved in 5 mL of acetonitrile) was added using a syringe under ambient conditions. After 20 minutes, the product was separated by precipitation with ethanol and recrystallized in a mixture of toluene and ethanol.

## S1.4 UV-Vis Recording

All experimental spectra were recorded at 78 K by dissolving the corresponding nanocluster in 2-methyltetrahydrofuran and the concentration was set at 1 mg/mL (0.135 M). All UV-Vis absorption spectra were recorded using an Agilent 8453 diode array spectrometer by placing 3 mL of the nanocluster solution into a 1 cm path quartz cell. The 78 K testing environment was created using a low-temperature accessory of the spectrometer assisted by liquid nitrogen.

## S2 Computational Details

All calculations were performed using the same effective core potentials (ECPs), DFT functionals, and basis sets in a two-component spinor framework. All Au and S atoms were treated using the CRENBL ECP<sup>4-8</sup> including spin-orbit coupling and the all-electron X2C-SV(P)ALL<sup>6-9</sup> basis set was used for H atoms. The PBE pure functional has shown success in qualitative studies in Au nanoparticles.<sup>10-13</sup> The hybrid PBE0 functional was used in this work.

The anion was optimized starting at a modified structure of the  $\text{Au}_{25}(\text{SCH}_3)_{18}^-$  nanocluster used in a study by Jiang *et. al.* as an initial guess.<sup>10</sup> In Ref. 10, Jiang *et. al.* replaced the SPET ligand in the experimental structure of  $\text{Au}_{25}(\text{SPET})_{18}^-$  with  $\text{SCH}_3$  and then fully optimized the  $\text{Au}_{25}(\text{SCH}_3)_{18}^-$  structure. We further modified the  $\text{Au}_{25}(\text{SCH}_3)_{18}^-$  structure by replacing all  $\text{CH}_3$  ligands with H atoms and the resulting  $\text{Au}_{25}(\text{SH})_{18}^-$  structure was optimized again while freezing S and Au atoms. The neutral and cationic nanocluster geometry optimizations used the optimized anion geometry as an initial guess.

Point group symmetry was determined only for the  $\text{Au}_{13}$  core with a tolerance of 0.1 Å. Double group theory notation used in the discussion of SOC orbitals were adopted from Altmann and Herzig.<sup>14</sup>

**Table S1.** Initial guess geometry for Au<sub>25</sub>(SH)<sub>18</sub><sup>-</sup> geometry optimization. Coordinates are given in Å.

| Atom | x          | y          | z          | Atom | x          | y          | z          |
|------|------------|------------|------------|------|------------|------------|------------|
| Au   | -0.0000885 | -0.0001091 | -0.0000271 | S    | 0.4936026  | 0.5482726  | 5.1030346  |
| Au   | 0.3872277  | 0.8749485  | 2.6676833  | S    | -2.4731704 | 3.6759960  | 2.5867286  |
| Au   | -1.7927749 | 1.9966002  | 0.9235247  | S    | -4.2726270 | -0.8648132 | 2.7767167  |
| Au   | -1.9867351 | -0.8257853 | 1.8678465  | S    | 2.0582931  | 3.4150426  | -4.7588103 |
| Au   | 1.1256729  | 2.5683654  | 0.4410713  | S    | -2.0416434 | -4.6950937 | -3.5362431 |
| Au   | 2.6786204  | 0.0163060  | 0.9550377  | S    | -2.0124748 | 3.8112365  | -2.8709241 |
| Au   | 3.2316376  | 2.7733868  | 2.8382573  | S    | -4.5702391 | -0.9141695 | -2.2537504 |
| Au   | -0.7333198 | -1.4585580 | 4.8203890  | S    | 5.6277437  | -2.6730753 | 0.0437644  |
| Au   | -0.1910256 | 4.1004554  | 3.0290360  | S    | -2.0314418 | -4.7582264 | 0.2296970  |
| Au   | -1.9996652 | -3.9994488 | 2.4651629  | S    | -0.4936003 | -0.5488877 | -5.1029805 |
| Au   | 0.6579257  | -2.0118399 | 1.8796801  | S    | 2.4729317  | -3.6764557 | -2.5864726 |
| Au   | -3.7804909 | 3.1121479  | -1.4556242 | S    | 4.2727994  | 0.8655743  | -2.7761051 |
| Au   | -4.8459218 | 0.8905441  | 1.3028838  | H    | -4.2280863 | -0.2558318 | 3.9357067  |
| Au   | -0.3873230 | -0.8752367 | -2.6676623 | H    | -0.3768421 | 1.3635790  | 5.6449769  |
| Au   | 1.7926868  | -1.9966955 | -0.9235382 | H    | 2.1164451  | 4.6445526  | 4.8427942  |
| Au   | 1.9867123  | 0.8256467  | -1.8677623 | H    | 0.9935753  | 5.5560964  | -0.1879484 |
| Au   | -1.1258543 | -2.5685217 | -0.4409917 | H    | -2.9152296 | 4.7374549  | 1.9590434  |
| Au   | -2.6787687 | -0.0165104 | -0.9550329 | H    | -2.3737312 | 3.4130893  | -4.0655256 |
| Au   | -3.2317456 | -2.7733854 | -2.8385324 | H    | 1.3320099  | 4.3482695  | -5.3224593 |
| Au   | 0.7331279  | 1.4580758  | -4.8202932 | H    | -4.5628704 | -0.2213189 | -3.3655075 |
| Au   | 0.1908359  | -4.1008402 | -3.0290352 | H    | 4.2287252  | 0.2573547  | -3.9355129 |
| Au   | 1.9994330  | 3.9991410  | -2.4651176 | H    | 0.3771322  | -1.3640459 | -5.6446835 |
| Au   | -0.6581093 | 2.0117216  | -1.8796863 | H    | -2.1165189 | -4.6444052 | -4.8431189 |
| Au   | 3.7805963  | -3.1121927 | 1.4553590  | H    | 2.9148865  | -4.7378663 | -1.9586322 |
| Au   | 4.8459463  | -0.8905056 | -1.3031006 | H    | -0.9934490 | -5.5563106 | 0.1880727  |
| S    | -2.0588541 | -3.4152630 | 4.7588269  | H    | -1.3328350 | -4.3485544 | 5.3227094  |
| S    | 2.0414296  | 4.6950445  | 3.5359188  | H    | 2.3738133  | -3.4133239 | 4.0651794  |
| S    | 2.0125679  | -3.8114002 | 2.8705510  | H    | 6.5163059  | -2.1000542 | 0.8172009  |
| S    | 4.5701741  | 0.9141997  | 2.2535404  | H    | 4.5629669  | 0.2214407  | 3.3653556  |
| S    | -5.6277081 | 2.6730040  | -0.0441308 | H    | -6.5162384 | 2.1000131  | -0.8176264 |
| S    | 2.0315195  | 4.7579542  | -0.2296715 |      |            |            |            |

**Table S2.** Optimized geometry of  $\text{Au}_{25}(\text{SH})_{18}^-$ . Coordinates are given in Å.

| Atom | x         | y         | z         | Atom | x         | y         | z         |
|------|-----------|-----------|-----------|------|-----------|-----------|-----------|
| Au   | -0.000089 | -0.000109 | -0.000027 | S    | 0.493603  | 0.548273  | 5.103035  |
| Au   | 0.387228  | 0.874949  | 2.667683  | S    | -2.473170 | 3.675996  | 2.586729  |
| Au   | -1.792775 | 1.996600  | 0.923525  | S    | -4.272627 | -0.864813 | 2.776717  |
| Au   | -1.986735 | -0.825785 | 1.867847  | S    | 2.058293  | 3.415043  | -4.758810 |
| Au   | 1.125673  | 2.568365  | 0.441071  | S    | -2.041643 | -4.695094 | -3.536243 |
| Au   | 2.678620  | 0.016306  | 0.955038  | S    | -2.012475 | 3.811237  | -2.870924 |
| Au   | 3.231638  | 2.773387  | 2.838257  | S    | -4.570239 | -0.914170 | -2.253750 |
| Au   | -0.73332  | -1.458558 | 4.820389  | S    | 5.627744  | -2.673075 | 0.043764  |
| Au   | -0.191026 | 4.100455  | 3.029036  | S    | -2.031442 | -4.758226 | 0.229697  |
| Au   | -1.999665 | -3.999449 | 2.465163  | S    | -0.493600 | -0.548888 | -5.102981 |
| Au   | 0.657926  | -2.011840 | 1.879680  | S    | 2.472932  | -3.676456 | -2.586473 |
| Au   | -3.780491 | 3.112148  | -1.455624 | S    | 4.272799  | 0.865574  | -2.776105 |
| Au   | -4.845922 | 0.890544  | 1.302884  | H    | -4.166958 | -0.215086 | 3.959797  |
| Au   | -0.387323 | -0.875237 | -2.667662 | H    | -0.450754 | 1.377855  | 5.607032  |
| Au   | 1.792687  | -1.996696 | -0.923538 | H    | 2.068998  | 4.580966  | 4.884976  |
| Au   | 1.986712  | 0.825647  | -1.867762 | H    | 0.933273  | 5.549256  | -0.190976 |
| Au   | -1.125854 | -2.568522 | -0.440992 | H    | -2.850902 | 4.775192  | 1.892528  |
| Au   | -2.678769 | -0.016510 | -0.955033 | H    | -2.395201 | 3.309103  | -4.069366 |
| Au   | -3.231746 | -2.773385 | -2.838532 | H    | 1.239004  | 4.338754  | -5.313825 |
| Au   | 0.733128  | 1.458076  | -4.820293 | H    | -4.506229 | -0.182147 | -3.392238 |
| Au   | 0.190836  | -4.100840 | -3.029035 | H    | 4.167577  | 0.216615  | -3.959647 |
| Au   | 1.999433  | 3.999141  | -2.465118 | H    | 0.450896  | -1.378425 | -5.606792 |
| Au   | -0.658109 | 2.011722  | -1.879686 | H    | -2.069044 | -4.580843 | -4.885289 |
| Au   | 3.780596  | -3.112193 | 1.455359  | H    | 2.850531  | -4.775572 | -1.892075 |
| Au   | 4.845946  | -0.890506 | -1.303101 | H    | -0.933074 | -5.549365 | 0.191099  |
| S    | -2.058854 | -3.415263 | 4.758827  | H    | -1.239847 | -4.339120 | 5.314017  |
| S    | 2.041430  | 4.695045  | 3.535919  | H    | 2.395275  | -3.309451 | 4.069076  |
| S    | 2.012568  | -3.811400 | 2.870551  | H    | 6.481362  | -2.039272 | 0.881364  |
| S    | 4.570174  | 0.914200  | 2.253540  | H    | 4.506302  | 0.182288  | 3.392108  |
| S    | -5.627708 | 2.673004  | -0.044131 | H    | -6.481250 | 2.039184  | -0.881795 |
| S    | 2.031520  | 4.757954  | -0.229672 |      |           |           |           |

**Table S3.** Optimized geometry of Au<sub>25</sub>(SH)<sub>18</sub><sup>0</sup>. Coordinates are given in Å.

| Atom | x         | y         | z         | Atom | x         | y         | z         |
|------|-----------|-----------|-----------|------|-----------|-----------|-----------|
| Au   | 0.000031  | 0.001922  | 0.006890  | S    | -1.065412 | -2.306403 | -4.449236 |
| Au   | -1.180574 | -1.183507 | -2.242152 | S    | -1.573691 | 2.488431  | -4.209168 |
| Au   | -0.522666 | 1.815905  | -2.063322 | S    | 3.144907  | 0.521280  | -4.058058 |
| Au   | 1.787219  | -0.253989 | -2.138845 | S    | -3.419319 | 3.626523  | 3.536226  |
| Au   | -2.714396 | 0.449877  | -0.596096 | S    | 4.964745  | 0.773423  | 3.478498  |
| Au   | -1.710614 | -2.199461 | 0.434910  | S    | -1.227504 | 5.032741  | 0.616298  |
| Au   | -4.128165 | -2.184906 | -1.746561 | S    | 3.650971  | 3.730183  | -0.027333 |
| Au   | 1.182081  | -2.834752 | -3.806705 | S    | -1.444670 | -4.904543 | 3.327525  |
| Au   | -3.186759 | 0.804487  | -3.666625 | S    | 5.059514  | -1.214711 | 0.230945  |
| Au   | 4.057134  | -2.372338 | -1.606776 | S    | 1.068523  | 2.309476  | 4.461684  |
| Au   | 1.023439  | -2.529083 | -0.705221 | S    | 1.574356  | -2.499634 | 4.213698  |
| Au   | 0.162442  | 4.793631  | -1.319167 | S    | -3.146744 | -0.514610 | 4.067801  |
| Au   | 2.182547  | 2.642549  | -3.506061 | H    | 2.289517  | 0.177584  | -5.087987 |
| Au   | 1.180199  | 1.183061  | 2.255174  | H    | -0.808676 | -1.189834 | -5.222031 |
| Au   | 0.521725  | -1.811012 | 2.072810  | H    | -4.682740 | -1.552098 | -4.580680 |
| Au   | -1.779165 | 0.254913  | 2.152169  | H    | -5.095040 | 2.244731  | -1.133993 |
| Au   | 2.712989  | -0.450031 | 0.609121  | H    | -2.270600 | 3.602250  | -3.781285 |
| Au   | 1.711146  | 2.194777  | -0.423258 | H    | -0.237908 | 5.327257  | 1.535117  |
| Au   | 4.119086  | 2.178367  | 1.735309  | H    | -3.131463 | 4.818193  | 2.895416  |
| Au   | -1.176330 | 2.834436  | 3.803823  | H    | 2.979831  | 4.683328  | 0.714844  |
| Au   | 3.177525  | -0.807607 | 3.663018  | H    | -2.290385 | -0.179421 | 5.099748  |
| Au   | -4.051689 | 2.364396  | 1.603614  | H    | 0.807672  | 1.194222  | 5.234998  |
| Au   | -1.015661 | 2.530215  | 0.716285  | H    | 4.658805  | 1.558527  | 4.574198  |
| Au   | -0.159980 | -4.788310 | 1.315584  | H    | 2.272002  | -3.609145 | 3.775878  |
| Au   | -2.186161 | -2.633658 | 3.500386  | H    | 5.086588  | -2.258324 | 1.136409  |
| S    | 3.426837  | -3.623635 | -3.546846 | H    | 3.143024  | -4.820589 | -2.914266 |
| S    | -4.978044 | -0.770796 | -3.479429 | H    | 0.254676  | -5.325421 | -1.535255 |
| S    | 1.240491  | -5.031141 | -0.612245 | H    | -2.596922 | -5.464376 | 2.808434  |
| S    | -3.644943 | -3.734916 | 0.011953  | H    | -2.965633 | -4.681024 | -0.731719 |
| S    | 1.432374  | 4.910626  | -3.340135 | H    | 2.585069  | 5.479262  | -2.831824 |
| S    | -5.065117 | 1.202800  | -0.226624 |      |           |           |           |

**Table S4.** Optimized geometry of Au<sub>25</sub>(SH)<sub>18</sub><sup>+</sup>. Coordinates are given in Å.

| Atom | x         | y         | z         | Atom | x         | y         | z         |
|------|-----------|-----------|-----------|------|-----------|-----------|-----------|
| Au   | 0.000040  | 0.001762  | -0.005347 | S    | 1.075224  | -2.214580 | 4.493645  |
| Au   | 1.186277  | -1.168036 | 2.249372  | S    | 1.795289  | 2.537691  | 4.090575  |
| Au   | 0.659525  | 1.851914  | 1.992543  | S    | -3.015472 | 0.787802  | 4.114108  |
| Au   | -1.740700 | -0.108256 | 2.190793  | S    | 3.483145  | 3.363646  | -3.727755 |
| Au   | 2.746888  | 0.343746  | 0.515115  | S    | -5.011057 | 0.898752  | -3.376332 |
| Au   | 1.598591  | -2.286972 | -0.407027 | S    | 1.428197  | 4.952273  | -0.805566 |
| Au   | 4.071118  | -2.318600 | 1.710481  | S    | -3.479575 | 3.890956  | 0.009216  |
| Au   | -1.208994 | -2.661641 | 3.923031  | S    | 1.131738  | -5.062328 | -3.209239 |
| Au   | 3.316367  | 0.766652  | 3.560103  | S    | -5.113878 | -0.986569 | -0.064677 |
| Au   | -4.116505 | -2.135639 | 1.781096  | S    | -1.078923 | 2.215983  | -4.504037 |
| Au   | -1.115323 | -2.457797 | 0.812212  | S    | -1.797642 | -2.553077 | -4.089143 |
| Au   | 0.088186  | 4.833181  | 1.175740  | S    | 3.014465  | -0.780251 | -4.123426 |
| Au   | -1.967706 | 2.843818  | 3.477591  | H    | -2.154053 | 0.434639  | 5.135785  |
| Au   | -1.185890 | 1.168087  | -2.259010 | H    | 0.887701  | -1.063873 | 5.235631  |
| Au   | -0.657638 | -1.847257 | -1.999092 | H    | 4.727984  | -1.627713 | 4.508963  |
| Au   | 1.731906  | 0.109157  | -2.201103 | H    | 5.222488  | 2.039347  | 0.935990  |
| Au   | -2.745385 | -0.344590 | -0.525342 | H    | 2.530341  | 3.605628  | 3.612507  |
| Au   | -1.598998 | 2.282091  | 0.399243  | H    | 0.424824  | 5.260274  | -1.704797 |
| Au   | -4.060408 | 2.312336  | -1.695273 | H    | 3.261887  | 4.583676  | -3.114375 |
| Au   | 1.202501  | 2.661889  | -3.917706 | H    | -2.787908 | 4.792614  | -0.777138 |
| Au   | -3.305444 | -0.770884 | -3.553724 | H    | 2.149018  | -0.436969 | -5.145084 |
| Au   | 4.109767  | 2.129134  | -1.775557 | H    | -0.886677 | 1.065555  | -5.245239 |
| Au   | 1.107533  | 2.459264  | -0.819624 | H    | -4.694017 | 1.636417  | -4.501450 |
| Au   | -0.088989 | -4.827669 | -1.167984 | H    | -2.533872 | -3.614094 | -3.597608 |
| Au   | 1.972499  | -2.834585 | -3.468200 | H    | -5.213958 | -2.053632 | -0.937070 |
| S    | -3.491798 | -3.357779 | 3.741472  | H    | -3.276069 | -4.583555 | 3.137834  |
| S    | 5.029258  | -0.894022 | 3.377007  | H    | -0.446351 | -5.259124 | 1.708532  |
| S    | -1.443944 | -4.949362 | 0.803424  | H    | 2.270769  | -5.661176 | -2.704707 |
| S    | 3.472630  | -3.896313 | 0.013102  | H    | 2.771721  | -4.788246 | 0.802280  |
| S    | -1.112684 | 5.066772  | 3.228540  | H    | -2.250586 | 5.679640  | 2.738679  |
| S    | 5.118682  | 0.974372  | 0.061424  |      |           |           |           |

### S3 Molecular Orbitals

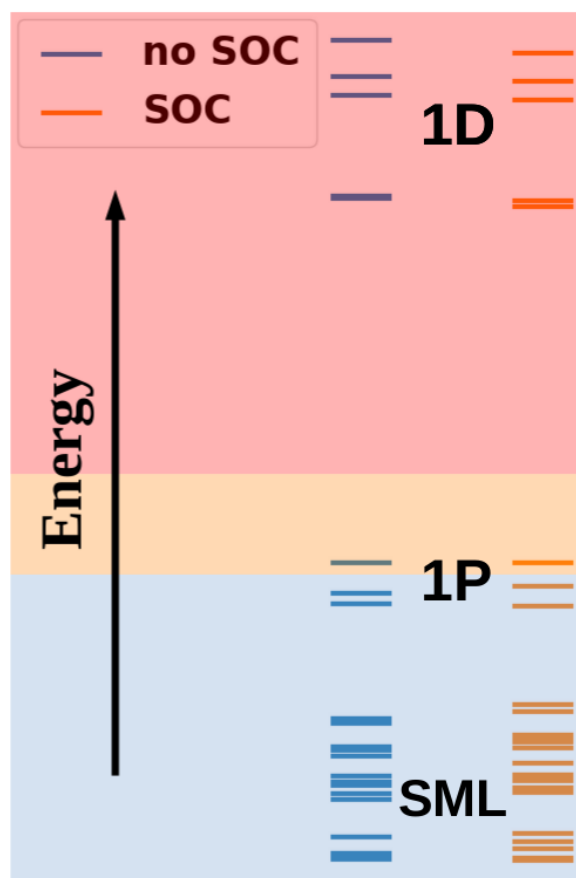

**Figure S1.** Molecular orbital diagram depicting the effects of SOC in neutral Au<sub>25</sub>. The blue-shaded region are doubly-occupied orbitals, orange-shaded region are singly-occupied orbitals, and the red-shaded region are unoccupied orbitals. Orbital energies were shifted such that the highest energy 1P were aligned.



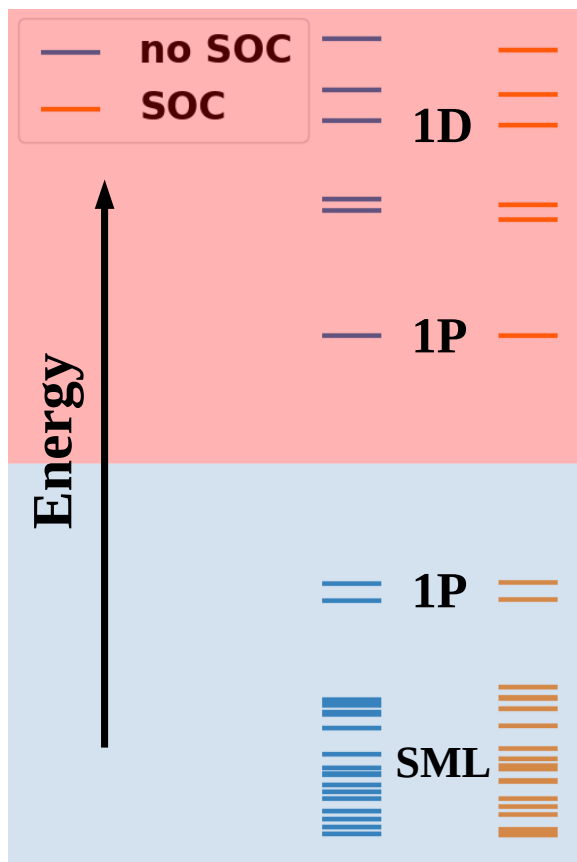

**Figure S2.** Molecular orbital diagram depicting the effects of SOC in the  $\text{Au}_{25}$  cation. The blue-shaded region are doubly-occupied orbitals and the red-shaded region are unoccupied orbitals. Orbital energies were shifted such that the highest energy  $1P$  were aligned.

**Table S5.** Atomic orbital character of  $\text{Au}_{25}(\text{SC}_6\text{H}_{13})_{18}^-$  superorbitals from calculation with SOC. Orbitals are arranged down the table with increasing energy.

| Superorbital | <i>s</i> | <i>p</i> | <i>d</i> |
|--------------|----------|----------|----------|
| $1P_1$       | 25.64%   | 39.86%   | 34.50%   |
| $1P_2$       | 24.17%   | 39.28%   | 36.55%   |
| $1P_3$       | 22.92%   | 38.55%   | 38.55%   |
| $1D_1$       | 41.50%   | 37.92%   | 20.56%   |
| $1D_2$       | 40.87%   | 37.87%   | 21.25%   |
| $1D_3$       | 40.22%   | 34.48%   | 25.30%   |
| $1D_4$       | 39.44%   | 33.14%   | 27.42%   |
| $1D_5$       | 40.36%   | 32.26%   | 27.38%   |

## S4 $\text{Au}_{25}(\text{SPET})_{18}^-$ UV-Vis Fingerprint Spectrum

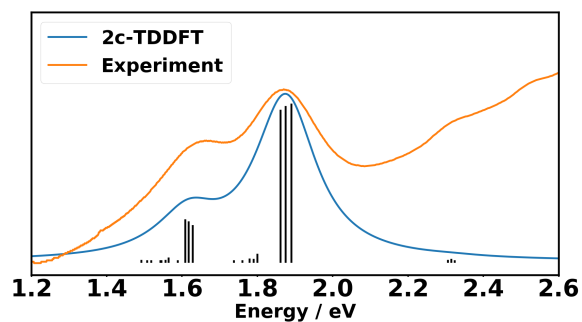

**Figure S3.** Experimental and computed spectra of  $\text{Au}_{25}(\text{SR})_{18}^-$ . The excited states obtained from 2C-TDDFT are plotted as black lines. Spectra were generated by applying Lorentzian broadening to the excited states with a half-width at half max of 0.095 eV. The computed spectrum is compared to the experimental spectrum of  $\text{Au}_{25}(\text{SPET})_{18}^-$ . Spectrum was recorded at 78 K.

## References

- (1) Zhu, M.; Lanni, E.; Garg, N.; Bier, M. E.; Jin, R. Kinetically Controlled, High-Yield Synthesis of Au<sub>25</sub> Clusters. *J. Am. Chem. Soc.* **2008**, *130*, 1138 – 1139.
- (2) Zhu, M.; Aikens, C. M.; Hendrich, M. P.; Gupta, R.; Qian, H.; Schatz, G. C.; Jin, R. Reversible Switching of Magnetism in Thiolate-Protected Au<sub>25</sub> Superatoms. *J. Am. Chem. Soc.* **2009**, *131*, 2490 – 2492.
- (3) Liu, Z.; Zhu, M.; Meng, X.; Xu, G.; Jin, R. Electron Transfer between [Au<sub>25</sub>(SC<sub>2</sub>H<sub>4</sub>Ph)<sub>18</sub>]<sup>-</sup>TOA<sup>+</sup> and Oxoammonium Cations. *J. Am. Chem. Soc.* **2009**, *131*, 2490 – 2492.
- (4) Pacios, L. F.; Christiansen, P. A. Ab Initio Relativistic Effective Potentials with Spin-orbit Operators. I. Li through Ar. *J. Chem. Phys.* **1984**, *82*, 2664–2671.
- (5) Ross, R. B.; Powers, J. M.; Atashroo, T.; C., E. W.; LaJohn, L. A.; Christiansen, P. A. Ab Initio Relativistic Effective Potentials with Spin-orbit Operators. IV. Cs through Rn. *J. Chem. Phys.* **1990**, *93*, 6654–6670.
- (6) Schuchardt, K. L.; Didier, B. T.; Elsethagen, T.; Sun, L.; Gurumoorthi, V.; Chase, J.; Li, J.; Windus, T. L. Basis Set Exchange: A Community Database for Computational Sciences. *J. Chem. Inf. Model.* **2007**, *47*, 1045–1052.
- (7) Feller, D. The Role of Databases in Support of Computational Chemistry Calculations. *J. Comput. Chem.* **1996**, *17*, 1571–1586.
- (8) Pritchard, B. P.; Altarawy, D.; Didier, B.; Gibson, T. D.; Windus, T. L. New Basis Set Exchange: An Open, Up-to-Date Resource for the Molecular Sciences Community. *J. Chem. Inf. Model.* **2019**, *59*, 4814–4820.
- (9) Pollak, P.; Weigand, F. Segmented Contracted Error-Consistent Basis Sets of Double-

- and Triple- $\zeta$  Valence Quality for One- and Two-Component Relativistic All-Electron Calculations. *J. Chem. Theory Comput.* **2017**, *13*, 3696–3705.
- (10) Jiang, D.-e.; Kühn, M.; Tang, Q.; Weigand, F. Superatomic Orbitals under Spin–Orbit Coupling. *J. Phys. Chem. Lett.* **2014**, *5*, 3286–3289.
- (11) Lopez-Acevedo, O.; Tsunoyama, H.; Tsukuda, T.; Hannu, H.; Aikens, C. M. Chirality and Electronic Structure of the Thiolate-Protected Au<sub>38</sub> Nanocluster. *J. Am. Chem. Soc.* **2010**, *132*, 8210–8218.
- (12) Tlahuice-Flores, A.; Whetten, R. L.; Jose-Yacaman, M. Ligand Effects on the Structure and the Electronic Optical Properties of Anionic Au<sub>25</sub>(SR)<sub>18</sub> Clusters. *J. Phys. Chem. C* **2013**, *117*, 20867–20875.
- (13) Akola, J.; Walter, M.; Whetten, R. L.; Häkkinen, H.; Grönbeck, H. On the Structure of Thiolate-Protected Au<sub>25</sub>. *J. Am. Chem. Soc.* **2008**, *130*, 3756–3757.
- (14) Altmann, S. L.; Herzig, P. *Point-Group Theory Tables*; Clarendon Press, 2011.
